# Supplementary material for: Fluorometric enhancement of the detection of H2O2using different organic substrates and a peroxidase-mimicking polyoxometalate
Source: Royal Society of Chemistry journal article supplement (doi:10.1039/c9ra00505f), 2019-01-01
Supplement: c9ra00505f1.pdf [file c9ra00505f1.pdf]

### Supplementary information

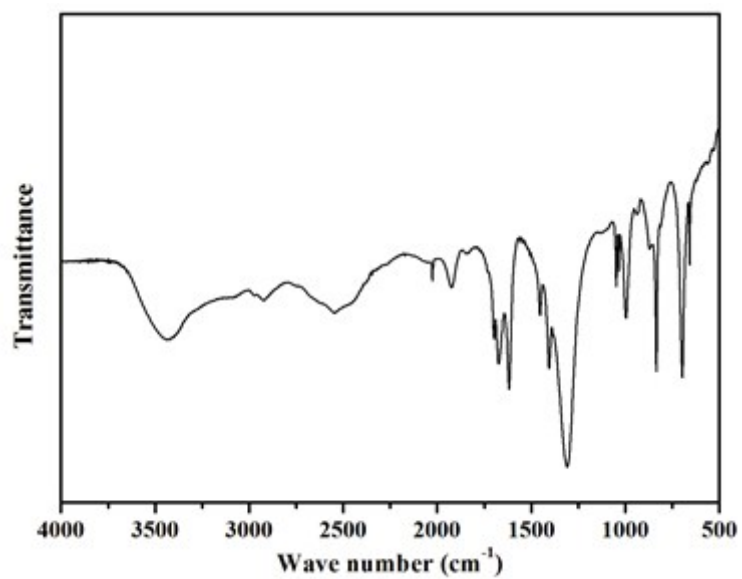

**Fig. S1.** FT-IR spectrum of Na<sub>10</sub>[α-SiW<sub>9</sub>O<sub>34</sub>]

**Table S1.**

The interference study for the determination of H<sub>2</sub>O<sub>2</sub> ( 5×10<sup>-5</sup> mol/L ) by the proposed method.

| Coexisting substance          | Content (mol/L )   | ΔI <sup>a</sup> /I (%) |
|-------------------------------|--------------------|------------------------|
| Na <sup>+</sup>               | 5×10 <sup>-3</sup> | -0.71                  |
| K <sup>+</sup>                | 5×10 <sup>-3</sup> | 1.50                   |
| NH <sub>4</sub> <sup>+</sup>  | 5×10 <sup>-3</sup> | 3.19                   |
| SO <sub>4</sub> <sup>2-</sup> | 2×10 <sup>-3</sup> | -2.67                  |
| Mn <sup>2+</sup>              | 2×10 <sup>-3</sup> | 1.77                   |
| Cl <sup>-</sup>               | 2×10 <sup>-3</sup> | 2.65                   |
| CO <sub>3</sub> <sup>2-</sup> | 2×10 <sup>-3</sup> | -13.26                 |
| Glucose                       | 2×10 <sup>-3</sup> | 2.23                   |
| Citric acid                   | 2×10 <sup>-3</sup> | -1.11                  |

<sup>a</sup>ΔI=I<sub>0</sub>-I, where I<sub>0</sub> and I are the fluorescence intensity of TH-Na<sub>10</sub>[α-SiW<sub>9</sub>O<sub>34</sub>]-H<sub>2</sub>O<sub>2</sub> system in absence and presence of interfering species.

**Table S2.**

The interference study for the determination of H<sub>2</sub>O<sub>2</sub> ( 5×10<sup>-4</sup> mol/L ) by the proposed method.

| Coexisting substance          | Content (mol/L )   | ΔI <sup>a</sup> /I (%) |
|-------------------------------|--------------------|------------------------|
| Na <sup>+</sup>               | 5×10 <sup>-3</sup> | -0.46                  |
| K <sup>+</sup>                | 5×10 <sup>-3</sup> | -1.50                  |
| NH <sub>4</sub> <sup>+</sup>  | 5×10 <sup>-3</sup> | -0.86                  |
| SO <sub>4</sub> <sup>2-</sup> | 2×10 <sup>-3</sup> | -2.56                  |
| Mn <sup>2+</sup>              | 2×10 <sup>-3</sup> | 3.72                   |
| Cl <sup>-</sup>               | 2×10 <sup>-3</sup> | 0.96                   |
| CO <sub>3</sub> <sup>2-</sup> | 2×10 <sup>-3</sup> | -1.59                  |
| Glucose                       | 2×10 <sup>-3</sup> | 2.61                   |
| Citric acid                   | 2×10 <sup>-3</sup> | 3.97                   |

<sup>a</sup>ΔI=I<sub>0</sub>-I, where I<sub>0</sub> and I are the fluorescence intensity of HPPA-Na<sub>10</sub>[α-SiW<sub>9</sub>O<sub>34</sub>]-H<sub>2</sub>O<sub>2</sub> system in absence and presence of interfering species.

**Table S3.**

Results of the analyses of H<sub>2</sub>O<sub>2</sub> in water samples, when the substrate was TH.

| Samples | Added (μM) | Detected (μM) | Recovery (%) | RSD (n = 3, %) |
|---------|------------|---------------|--------------|----------------|
| 1       | 25         | 24.16±0.981   | 96.55        | 4.06           |
| 2       | 50         | 47.61±0.392   | 95.20        | 0.82           |
| 3       | 100        | 104.25±1.581  | 104.22       | 1.52           |

**Table S4.**

Results of the analyses of H<sub>2</sub>O<sub>2</sub> in water samples, when the substrate was HPPA.

| Samples | Added (mM) | Detected (mM) | Recovery (%) | RSD (n = 3, %) |
|---------|------------|---------------|--------------|----------------|
| 1       | 0.05       | 0.065±0.0018  | 128.76       | 2.75           |
| 2       | 0.1        | 0.121±0.0020  | 118.84       | 1.67           |
| 3       | 0.2        | 0.191±0.0021  | 95.28        | 1.08           |
